# Supplementary material for: Admirable stability achieved by ns2ions Co-doping for all-inorganic metal halides towards optical anti-counterfeiting
Source: Royal Society of Chemistry journal article supplement (doi:10.1039/d3ra00351e), 2023-01-01
Supplement: d3ra00351e1.pdf [file d3ra00351e1.pdf]

**Supporting Information**

**Admirable Stability Achieved by ns<sup>2</sup> Ions Co-doping for All-inorganic Metal Halide towards Optical Anti-counterfeiting**

*Chuang Yang,<sup>a</sup> Fengwan Guo,<sup>\*a</sup> Shanping Wang,<sup>a</sup> Wenwen Chen,<sup>a</sup> Nan Wang<sup>a</sup>, Zhuozhen Li<sup>a</sup> and Juan Wang<sup>\*c</sup>*

*a Collaborative Innovation Center for Advanced Organic Chemical Materials, Co-constructed by the Province and Ministry of Education Key Laboratory for the Synthesis and Application of Organic Functional Molecules, College of Chemistry and Chemical Engineering, Hubei University, Wuhan 430062, PR China*

*b Hubei Key Laboratory of Ferro & Piezoelectric Materials and Devices, Hubei University, Wuhan, 430062 (P. R. China).*

*c Collaborative Innovation Center for Advanced Organic Chemical Materials Co-constructed by the Province and Ministry, Hubei University, Wuhan, 430062 (P. R. China).*

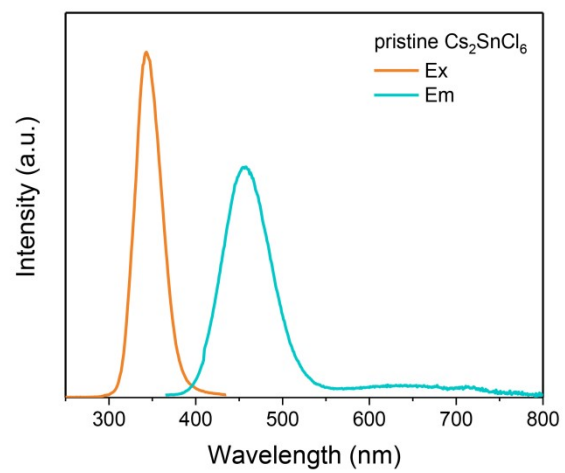

**Figure S1.** The PL and PLE spectra of pristine  $\text{Cs}_2\text{SnCl}_6$ .

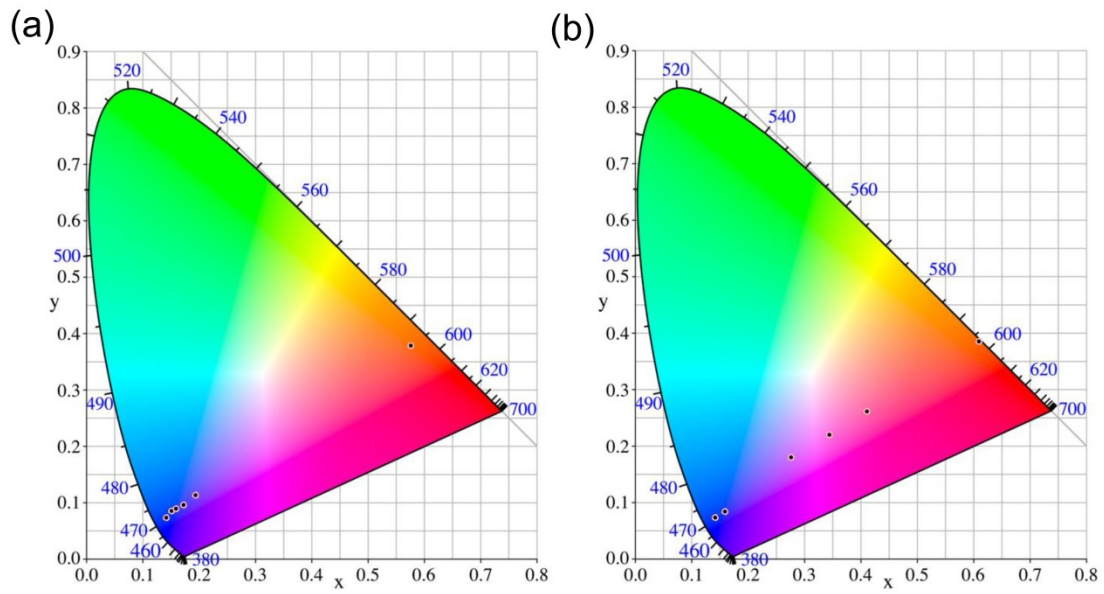

**Figure S2.** (a) CIE chromaticity coordinates of  $\text{Cs}_2\text{SnCl}_6:\text{Bi}_{0.2-x}\text{Sb}_x$  sample excited at 365 nm. ( $x=0, 0.04, 0.08, 0.12, 0.16, 0.2$ ) (b) CIE chromaticity coordinates of  $\text{Cs}_2\text{SnCl}_6:\text{Bi}_{0.2-x}\text{Sb}_x$  sample excited at 395 nm. ( $x=0, 0.04, 0.08, 0.12, 0.16, 0.2$ )

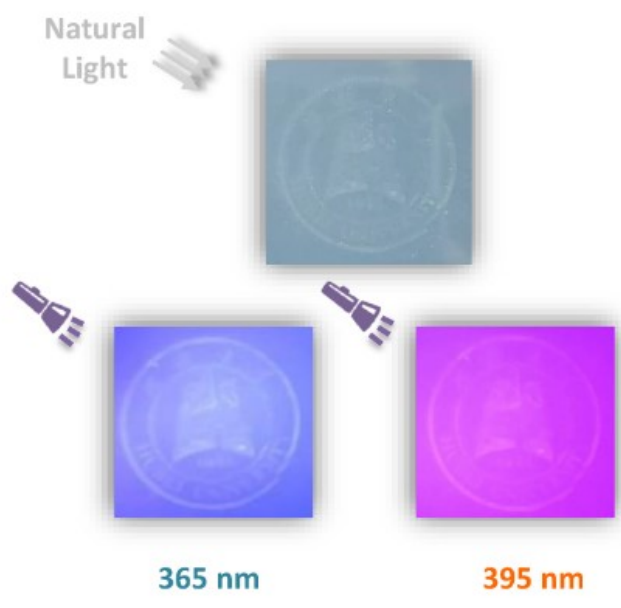

**Figure S3** Photograph of pattern made by anti-counterfeiting ink composed of  $\text{Cs}_2\text{SnCl}_6:\text{Bi}_{0.08}\text{Sb}_{0.12}$  at natural light and irradiated by a UV lamp at 365 nm and 395 nm

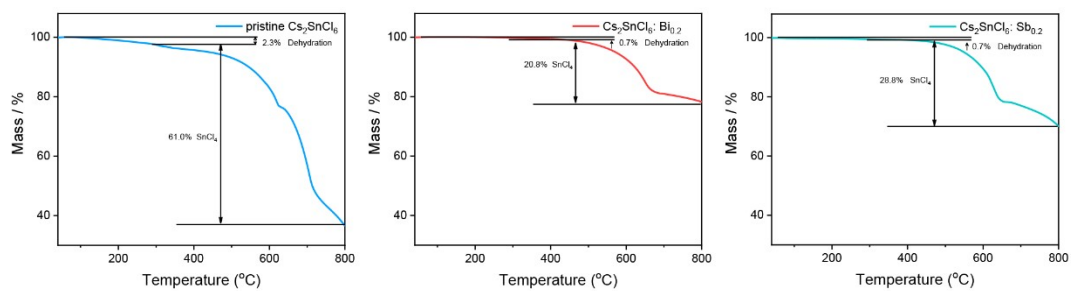

**Figure S4.** The thermogravimetric analysis of pristine  $\text{Cs}_2\text{SnCl}_6$ ,  $\text{Cs}_2\text{SnCl}_6:\text{Bi}_{0.2}$  and  $\text{Cs}_2\text{SnCl}_6:\text{Sb}_{0.2}$ .

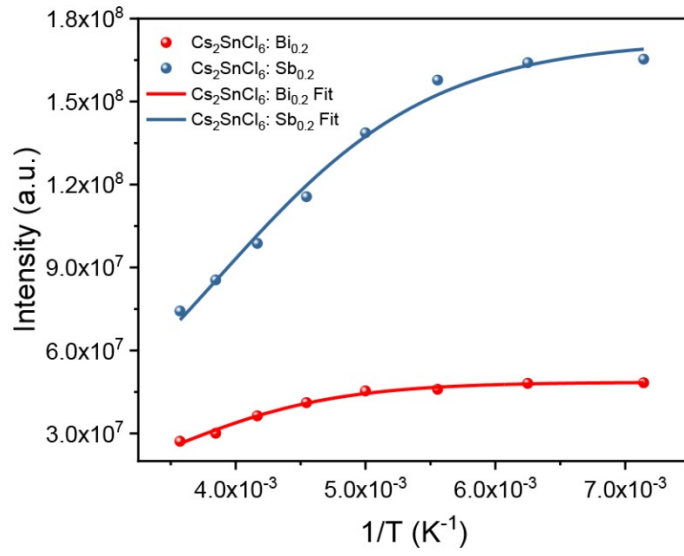

**Figure S5** Integrated PL intensity as a function of temperature for Cs<sub>2</sub>SnCl<sub>6</sub>: Bi<sub>0.2</sub> and Cs<sub>2</sub>SnCl<sub>6</sub>: Sb<sub>0.2</sub> crystals. The line represents fit curve of binding energies.

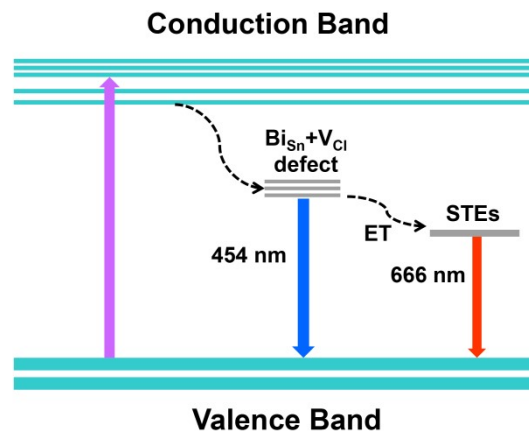

**Figure S6.** The schematic representation of the luminescent emission mechanism of Bi<sup>3+</sup> and Sb<sup>3+</sup> co-doped Cs<sub>2</sub>SnCl<sub>6</sub>.

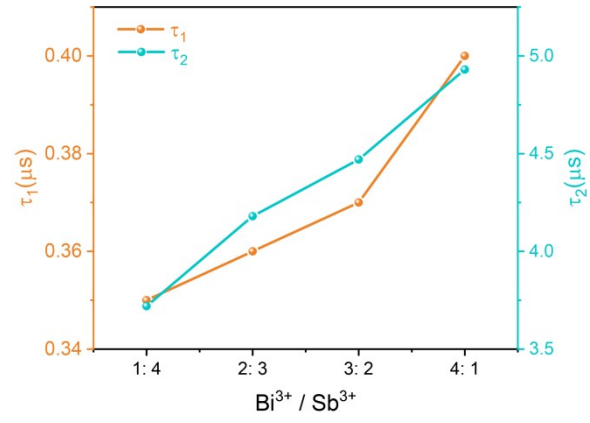

**Figure S7.** Broken line of photoluminescence lifetime at 666nm with different  $\text{Bi}^{3+}/\text{Sb}^{3+}$  codoping contents.



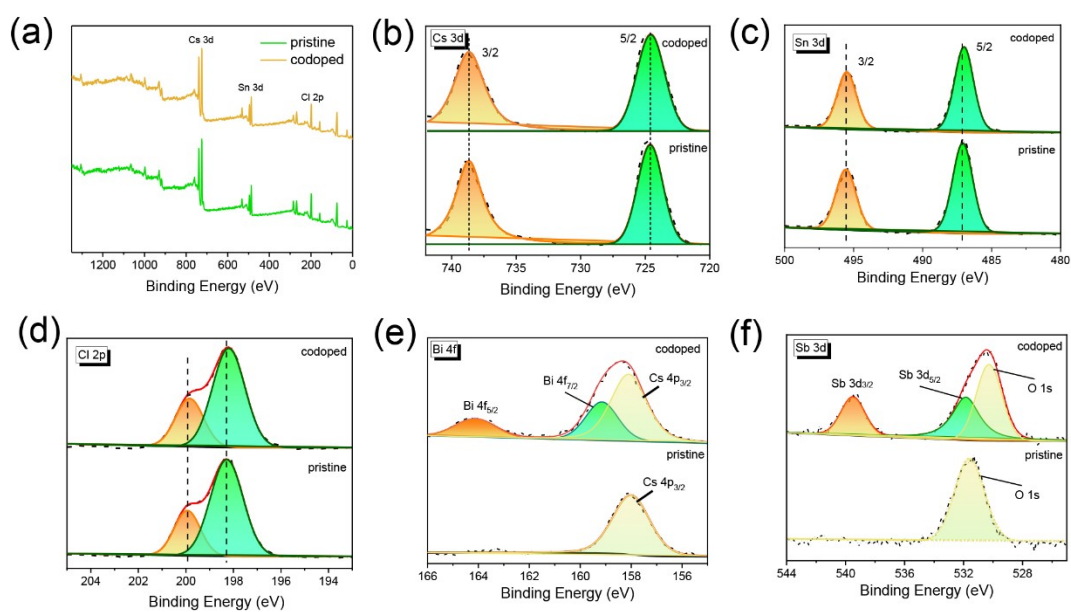

**Figure S8 (a)** Full range of XPS of pristine  $\text{Cs}_2\text{SnCl}_6$  and  $\text{Cs}_2\text{SnCl}_6:\text{Bi}_{0.08}\text{Sb}_{0.12}$ . **(b-f)** High-resolution XPS of Cs ( $3d_{3/2}$ ,  $3d_{5/2}$ ), Sn ( $3d_{3/2}$ ,  $3d_{5/2}$ ), Cl ( $2p_{1/2}$ ,  $2p_{3/2}$ ), Bi ( $4f_{5/2}$ ,  $4f_{7/2}$ ) and Sb ( $3d_{3/2}$ ,  $3d_{5/2}$ ) in pristine  $\text{Cs}_2\text{SnCl}_6$  and  $\text{Cs}_2\text{SnCl}_6:\text{Bi}_{0.08}\text{Sb}_{0.12}$ .

**Table S1. Comparison of Bi<sup>3+</sup> and Sb<sup>3+</sup> concentrations obtained from ICP-MS of Cs<sub>2</sub>SnCl<sub>6</sub>: Bi<sub>0.2-x</sub>Sb<sub>x</sub> (x= 0, 0.04, 0.08, 0.12, 0.16, 0.2). Bi% is calculated following the equation  $([Bi]/[Sn]) \times 100\%$ . Sb% is calculated following the equation  $([Sb]/[Sn]) \times 100\%$ .**

| Sample Category                                                           | Precursor |      | Product (ICP-MS) |       |
|---------------------------------------------------------------------------|-----------|------|------------------|-------|
|                                                                           | Bi %      | Sb % | Bi %             | Sb %  |
| Cs <sub>2</sub> SnCl <sub>6</sub> : Bi <sub>0.2</sub>                     | 20        | 0    | 4.55             | 0     |
| Cs <sub>2</sub> SnCl <sub>6</sub> : Bi <sub>0.16</sub> Sb <sub>0.04</sub> | 16        | 4    | 4.49             | 3.34  |
| Cs <sub>2</sub> SnCl <sub>6</sub> : Bi <sub>0.12</sub> Sb <sub>0.08</sub> | 12        | 8    | 3.82             | 6.31  |
| Cs <sub>2</sub> SnCl <sub>6</sub> : Bi <sub>0.08</sub> Sb <sub>0.12</sub> | 8         | 12   | 2.30             | 7.47  |
| Cs <sub>2</sub> SnCl <sub>6</sub> : Bi <sub>0.04</sub> Sb <sub>0.16</sub> | 4         | 16   | 1.40             | 14.07 |
| Cs <sub>2</sub> SnCl <sub>6</sub> : Sb <sub>0.2</sub>                     | 0         | 20   | 0                | 14.89 |

**Table S2.** The lifetime ( $\mu\text{s}$ ) of  $\text{Cs}_2\text{SnCl}_6:\text{Bi}_{0.2-x}\text{Sb}_x$  ( $x = 0, 0.04, 0.08, 0.12, 0.16, 0.2$ ) at 454 and 666 nm.

| Emission Peak | $\tau(\mu\text{s})$ | $\text{Cs}_2\text{SnCl}_6:\text{Bi}_{0.2}$ | $\text{Cs}_2\text{SnCl}_6:\text{Bi}_{0.16}\text{Sb}_{0.04}$ | $\text{Cs}_2\text{SnCl}_6:\text{Bi}_{0.12}\text{Sb}_{0.08}$ | $\text{Cs}_2\text{SnCl}_6:\text{Bi}_{0.08}\text{Sb}_{0.12}$ | $\text{Cs}_2\text{SnCl}_6:\text{Bi}_{0.04}\text{Sb}_{0.16}$ | $\text{Cs}_2\text{SnCl}_6:\text{Sb}_{0.2}$ |
|---------------|---------------------|--------------------------------------------|-------------------------------------------------------------|-------------------------------------------------------------|-------------------------------------------------------------|-------------------------------------------------------------|--------------------------------------------|
| 454 nm        | $\tau$              | 0.3819                                     | 0.3425                                                      | 0.3276                                                      | 0.3087                                                      | 0.3064                                                      | —                                          |
| 666 nm        | $\tau_1$            | —                                          | 0.40                                                        | 0.37                                                        | 0.36                                                        | 0.35                                                        | 0.34                                       |
|               | $\tau_2$            | —                                          | 4.93                                                        | 4.47                                                        | 4.18                                                        | 3.72                                                        | 3.84                                       |
